# Supplementary material for: A Case Series on Natural Conceptions Resulting in Ongoing Pregnancies in Menopausal and Prematurely Menopausal Women Following Platelet-Rich Plasma Treatment
Source: PubMed Central journal article supplement — Cell Transplant. 2019 Jul 4;28(9-10):1333–40. doi: 10.1177/0963689719859539 (PMC6767896; doi:10.1177/0963689719859539), 2019-07-04
Supplement: Supplementary_material.pdf [file Supplementary_material.pdf]

Figure 1. Sequence of images recorded during PRP procedure.

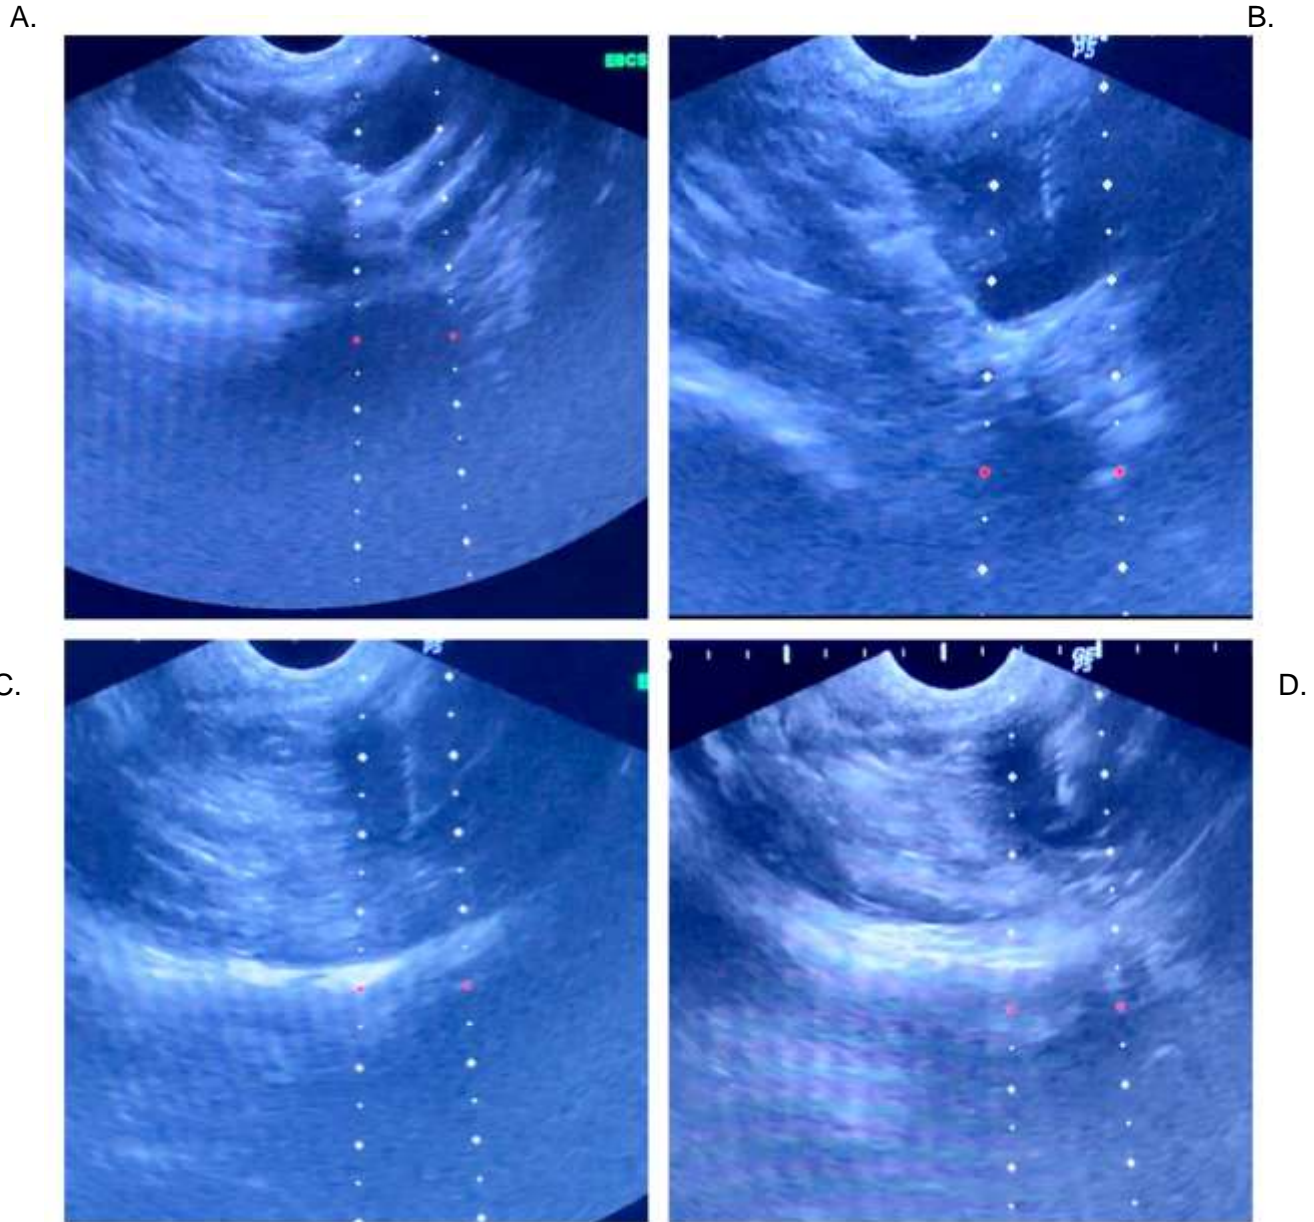

- A. Transvaginal Ultrasound Scan Image depicting the right ovary, aligned with the needle guide, prior to needle insertion.
- B. Transvaginal Ultrasound Scan Image depicting the right ovary, aligned with the needle guide, while the needle is introduced into the right ovary.
- C. Transvaginal Ultrasound Scan Image depicting the right ovary, aligned with the needle guide, while the needle is fully inserted.
- D. Transvaginal Ultrasound Scan Image depicting the right ovary, aligned with the needle guide, while PRP is injected.
